# Supplementary material for: The Effect of a Direct Fed Microbial on Liveweight and Milk Production in Dairy Cattle
Source: MDPI journal article supplement (doi:10.3390/ani14071092), 2024-04-03
Supplement: s1 [file s1]

**Table S1.** Estimated coefficients and 95% confidence interval of explanatory variables influencing the association between milk fat yield (kg/d) and experimental groups. Coefficients estimated from a mixed effects model with random intercepts (cow) and random slopes (days in milk).

| Explanatory Variable                          | Coefficient (SE) | 95% Confidence Interval | p-Value * |
|-----------------------------------------------|------------------|-------------------------|-----------|
| Intercept                                     | 1.08 (0.1)       | 0.89; 1.27              | <0.001    |
| Days in milk (DIM, polynomial) **             |                  |                         | <0.01     |
| 1 <sup>st</sup> order                         | 0.44 (0.18)      | 0.08; 0.8               |           |
| 2 <sup>nd</sup> order                         | -0.23 (0.11)     | -0.45; -0.01            |           |
| 3 <sup>rd</sup> order                         | -0.29 (0.15)     | -0.58; 0                |           |
| 4 <sup>th</sup> order                         | -0.37 (0.12)     | -0.6; -0.13             |           |
| Experimental groups                           |                  |                         | 0.76      |
| Control                                       | Reference        |                         |           |
| DFM                                           | 0.04 (0.14)      | -0.22; 0.31             |           |
| Cow parity                                    |                  |                         | <0.001    |
| 1 <sup>st</sup> &2 <sup>nd</sup> (category 1) | Reference        |                         |           |
| >2 <sup>nd</sup> (category 2)                 | 0.11 (0.03)      | 0.05; 0.17              |           |
| Production season                             |                  |                         | <0.01     |
| First (2021/2022)                             | Reference        |                         |           |
| Second (2022/2023)                            | -0.13 (0.03)     | -0.19; -0.08            |           |
| Experimental Group x DIM                      |                  |                         | 0.71      |
| Control x DIM                                 | Reference        |                         |           |
| DFM x 1 <sup>st</sup> order                   | -0.04 (0.27)     | -0.56; 0.48             |           |
| DFM x 2 <sup>nd</sup> order                   | -0.13 (0.17)     | -0.46; 0.2              |           |
| DFM x 3 <sup>rd</sup> order                   | -0.04 (0.22)     | -0.47; 0.38             |           |
| DFM x 4 <sup>th</sup> order                   | -0.05 (0.17)     | -0.39; 0.29             |           |

\* Likelihood ratio *p* values; \*\* fourth-order cubic spline polynomial was determined by the likelihood ratio test and model AIC. DFM—Direct fed microbials.

**Table S2.** Estimated coefficients and 95% confidence interval of explanatory variables influencing the association between milk protein yield (kg/d) and experimental groups. Coefficients estimated from a mixed effects model with random intercepts (cow) and random slopes (days in milk).

| Explanatory Variable                          | Coefficient (SE) | 95% Confidence Interval | p-Value * |
|-----------------------------------------------|------------------|-------------------------|-----------|
| Intercept                                     | 0.87 (0.11)      | 0.34; 1.05              | <0.001    |
| Days in milk (DIM, polynomial) **             |                  |                         | 0.06      |
| 1 <sup>st</sup> order                         | 0.19 (0.1)       | -0.16; 0.75             |           |
| 2 <sup>nd</sup> order                         | -0.06 (0.05)     | -0.12; 0.21             |           |
| 3 <sup>rd</sup> order                         | -0.25 (0.06)     | -0.07; 0.42             |           |
| Experimental groups                           |                  |                         | 0.56      |
| Control                                       | Reference        |                         |           |
| DFM                                           | -0.04 (0.06)     | -0.15; 0.3              |           |
| Cow parity                                    |                  |                         | <0.001    |
| 1 <sup>st</sup> &2 <sup>nd</sup> (category 1) | Reference        |                         |           |
| >2 <sup>nd</sup> (category 2)                 | -0.01 (0.02)     | 0.03; 0.15              |           |
| Production season                             |                  |                         | <0.01     |
| First (2021/2022)                             | Reference        |                         |           |
| Second (2022/2023)                            | -0.13 (0.03)     | -0.19; -0.08            |           |
| Experimental Group x DIM                      |                  |                         | 0.65      |
| Control x DIM                                 | Reference        |                         |           |
| DFM x 1 <sup>st</sup> order                   | 0.01 (0.15)      | -0.83; 0.29             |           |

|                             |              |             |
|-----------------------------|--------------|-------------|
| DFM x 2 <sup>nd</sup> order | -0.01 (0.08) | -0.35; 0.15 |
| DFM x 3 <sup>rd</sup> order | 0.03 (0.09)  | -0.32; 0.26 |

\* Likelihood ratio *p* values; \*\* fourth-order cubic spline polynomial was determined by the likelihood ratio test and model AIC. DFM—Direct fed microbials.

**Table S3.** Estimated coefficients and 95% confidence interval of explanatory variables influencing the association between milk log somatic cell count ('000 X cells per mL) and experimental groups. Coefficients estimated from a mixed effects model with random intercepts (cow) and random slopes (days in milk

| Explanatory Variable                          | Coefficient (SE) | 95% Confidence Interval | <i>p</i> -Value * |
|-----------------------------------------------|------------------|-------------------------|-------------------|
| Intercept                                     | 5.54 (0.98)      | 3.64; 7.43              | <0.001            |
| Days in milk (DIM, polynomial) **             |                  |                         | <0.03             |
| 1 <sup>st</sup> order                         | -4.58 (2.07)     | -8.65; -0.56            |                   |
| 2 <sup>nd</sup> order                         | -0.58 (0.82)     | -2.16; 1.04             |                   |
| 3 <sup>rd</sup> order                         | -1.65 (1.13)     | -3.87; 0.57             |                   |
| Experimental groups                           |                  |                         | 0.75              |
| Control                                       | Reference        |                         |                   |
| DFM                                           | -0.33 (1.05)     | -2.37; 1.68             |                   |
| Cow parity                                    |                  |                         | <0.001            |
| 1 <sup>st</sup> &2 <sup>nd</sup> (category 1) |                  |                         |                   |
| >2 <sup>nd</sup> (category 2)                 | 0.44 (0.23)      | 0.01; 0.88              |                   |
| Production season                             |                  |                         | <0.01             |
| First (2021/2022)                             | Reference        |                         |                   |
| Second (2022/2023)                            | -0.13 (0.03)     | -0.19; -0.08            |                   |
| Experimental Group x DIM                      |                  |                         | 0.45              |
| Control x DIM                                 | Reference        |                         |                   |
| DFM x 1 <sup>st</sup> order                   | 3.01 (2.6)       | -2; 8.09                |                   |
| DFM x 2 <sup>nd</sup> order                   | -0.62 (1.21)     | -2.98; 1.68             |                   |
| DFM x 3 <sup>rd</sup> order                   | 0.51 (1.37)      | -2.14; 3.19             |                   |

\* Likelihood ratio *p* values; \*\* fourth-order cubic spline polynomial was determined by the likelihood ratio test and model AIC. DFM—Direct fed microbials.
